# Supplementary material for: Branched-chain amino acids sustain pancreatic cancer growth by regulating lipid metabolism
Source: PubMed Central journal article supplement (PMC6884453; doi:10.1038/s12276-019-0350-z), 2019-11-29
Supplement: 12276_2019_350_MOESM1_ESM.pdf [file 12276_2019_350_MOESM1_ESM.pdf]

## **Supplemental Information**

### **Branched-chain amino acids sustain pancreatic cancer growth by regulating lipid metabolism**

Ji Hyeon Lee<sup>1,\*</sup>, Young-ra Cho<sup>1,\*</sup>, Ji Hye Kim<sup>1</sup>, Jongwook Kim<sup>1</sup>, Hae Yun Nam<sup>2</sup>, Seong Who Kim<sup>2</sup>, Jaekyoung Son<sup>1</sup>

<sup>1</sup>Department of Biomedical Sciences, Asan Medical Center, AMIST, University of Ulsan College of Medicine, Seoul 05505, South Korea

<sup>2</sup>Department of Biochemistry and Molecular Biology, Asan Medical Center, University of Ulsan College of Medicine, Seoul 05505, South Korea

\*These authors contributed equally to this work.

Correspondence: Jaekyoung Son,

Department of Biomedical Sciences, University of Ulsan College of Medicine,

88, Olympic-ro 43-gil, Songpa-gu, Seoul 05505, South Korea

Phone: 82-2-3010-4184; Fax: 82-2-3010-2097; E-mail: jaekson@amc.seoul.kr

## Supplementary Figure 1

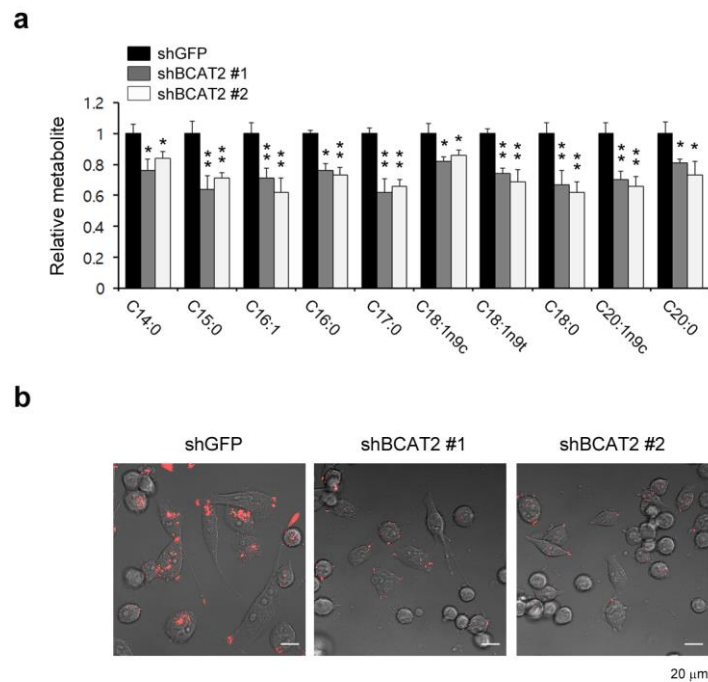

**Supplementary Figure 1.** BCAT2 knockdown results in significant reductions of levels of both fatty acids and triglycerides. **a** Free fatty acid pools in 8988T cells expressing control (shGFP) or shRNAs targeting BCAT2 were analyzed via LC-MS/MS. **b** 8988T cells expressing control (shGFP) or shRNAs targeting BCAT2 were assayed for intracellular triglyceride levels with Adipo Red staining. Error bars represent the s.d. of triplicate wells from a representative experiment. \*,  $p < 0.05$ ; \*\*,  $p < 0.01$ .
